# Supplementary material
Source: PubMed Central journal article supplement (PMC3582291)
Supplement: cn3001922_si_007.pdf [file cn3001922_si_007.pdf]

## Supporting Information

### Predicting efflux ratios and blood-brain barrier penetration from chemical structure: combining passive permeability with active efflux by P-glycoprotein

Elena Dolgih, Matthew P. Jacobson

<sup>1</sup>Department of Pharmaceutical Chemistry, University of California, San Francisco, San Francisco, California, USA, 94158

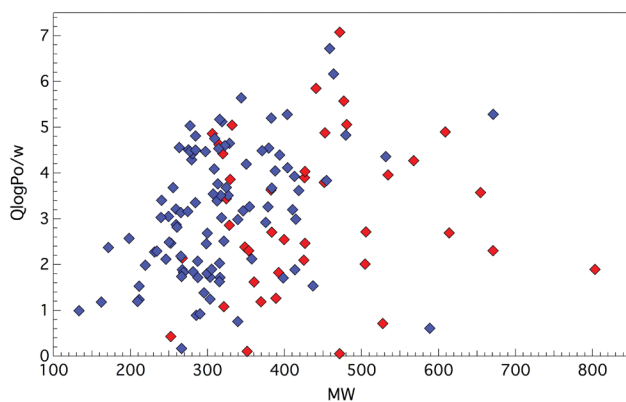

**Figure 1.** QlogP vs MW for compounds with experimental ER > 3 (red) and ER < 3 (blue).

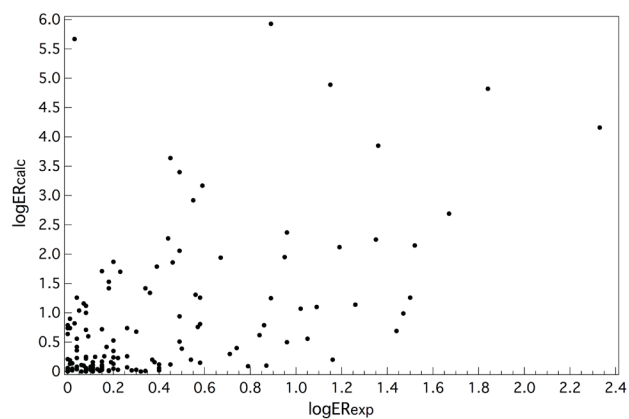

**Figure 2.** Calculated vs. experimental efflux ratio values.

Table S1.

| Compound                 | Efflux Ratio |       |       |         |      |      |         |         | Papp (nm/s) |        |       |         |      |      | logPmcw2 | GlideXP | Excluded |
|--------------------------|--------------|-------|-------|---------|------|------|---------|---------|-------------|--------|-------|---------|------|------|----------|---------|----------|
|                          | Doan         | Polli | Wager | Carrara | Feng | Chen | Average | St.dev. | Doan        | Polli  | Wager | Carrara | Feng | Chen |          |         |          |
| Acrivastine              | 3.71         |       |       |         |      |      | 4.7     |         | 11.7        |        |       |         |      |      | -15.8    | -13.3   |          |
| Actinomycin              |              | >80   |       |         |      |      | >80     |         |             | < 0.21 |       |         |      |      | -        | -       | MW > 800 |
| Alprazolam               |              |       | 1.4   |         |      |      | 1.4     |         |             |        |       |         |      |      | -10.2    | -10.2   |          |
| Alprenolol               | 1.01         |       |       |         |      |      | 1.0     |         | 461         |        |       |         |      |      | -8.3     | -10.4   |          |
| Amantadine               | 0.95         | 0.84  |       |         |      |      | 0.9     | 0.1     | 427         | 186    |       |         |      |      | -11.1    | -10.6   | ER < 1   |
| Amfebutamone (Bupropion) |              |       | 1.2   |         |      |      | 1.2     |         |             |        | 321   |         |      |      | -6.2     | -10.1   |          |
| Amisulpride              |              |       | 9.2   |         |      |      | 9.2     |         |             |        | 11    |         |      |      | -18.1    | -12.1   |          |
| Amitriptylline           | 1.34         |       |       |         |      |      | 1.3     |         | 474         |        |       |         |      |      | -7.8     | -13.0   |          |
| Amprenavir               | 29           | 32.4  |       | 20.9    |      |      | 27.4    | 5.9     | 28.8        | 21.7   |       | 18      |      |      | -12.4    | -12.9   |          |
| Aniracetam               |              |       | 1.1   |         |      |      | 1.1     |         |             |        |       |         |      |      | -10.6    | -10.2   |          |
| Antipyrine               | 0.94         |       |       | 0.73    |      |      | 0.8     | 0.1     | 792         |        |       | 658     |      |      | -8.3     | -9.4    | ER < 1   |
| Apomorphine              |              |       | 6.9   |         |      |      | 6.9     |         |             |        | 27    |         |      |      | -12.4    | -12.6   |          |
| Aprepitant               |              |       | 5.5   |         |      |      | 5.5     |         |             |        | 44    |         |      |      | -10.4    | -14.1   |          |
| Astemizole               | 2.22         |       |       | 2.16    |      |      | 2.2     | 0.0     | 184         |        |       | 50      |      |      | -13.3    | -15.9   |          |
| Atenolol                 | 1.24         |       |       | 0.8     |      |      | 1.0     | 0.3     | 2.56        |        |       | 10      |      |      | -13.0    | -10.0   |          |
| Atomoxetine              |              |       | 2.5   |         |      |      | 2.5     |         |             |        | 167   |         |      |      | -9.0     | -10.7   |          |
| Biperiden                | 0.95         |       |       |         |      |      | 1.0     |         | 515         |        |       |         |      |      | -8.6     | -13.5   |          |
| Bromazepam               |              |       | 1.2   |         |      |      | 1.2     |         |             |        | 275   |         |      |      | -11.6    | -11.7   |          |
| Bromocriptine            | 1.26         |       | 5.8   |         |      |      | 3.5     | 3.2     | 194         |        | 55    |         |      |      | -18.7    | -13.1   |          |
| Brotizolam               |              |       | 1.3   |         |      |      | 1.3     |         |             |        | 308   |         |      |      | -9.9     | -10.6   |          |
| Bufuralol                | 0.78         |       |       |         |      |      | 0.8     |         | 641         |        |       |         |      |      | -10.7    | -13.4   | ER < 1   |
| Buspirone                | 0.95         |       | 1.3   | 0.48    | 0.8  |      | 0.9     | 0.3     | 547         |        | 300   | 689     | 233  |      | -15.9    | -9.7    | ER < 1   |
| Cabergoline              |              |       | 14.3  |         |      |      | 14.3    |         |             |        | 13    |         |      |      | -9.6     | -13.7   |          |
| Caffeine                 |              |       |       | 0.51    | 0.6  |      | 0.6     | 0.1     |             |        | 374   | 482     | 306  |      | -11.5    | -9.7    | ER < 1   |
| Carbamazepine            | 0.98         |       | 1     |         | 0.7  |      | 0.9     | 0.2     | 602         |        | 361   |         | 294  |      | -10.7    | -11.4   | ER < 1   |
| Carisoprodol             |              |       | 1.2   |         | 0.7  |      | 1.0     | 0.4     |             |        |       |         | 25.6 |      | -9.6     | -8.1    |          |
| Cetirizine               | 8.65         |       |       |         |      | 5.8  | 7.2     | 2.0     | 25.1        |        |       |         |      |      | -11.7    | -14.5   |          |
| Chloroquine              |              | 3.83  |       |         |      |      | 3.8     |         |             | 44.9   |       |         |      |      | -13.0    | -12.7   |          |
| Chlorpheniramine         | 0.93         | 1.14  |       | 0.77    |      |      | 0.9     | 0.2     | 468         | 562    |       | 303     |      |      | -9.9     | -11.8   | ER < 1   |
| Chlorpromazine           | 1.27         | 1.09  | 5.7   |         | 1.5  |      | 2.4     | 2.2     | 303         | 438    |       |         | 41   |      | -10.8    | -11.8   |          |
| Chlorprothixene          | 1.26         |       |       |         |      |      | 1.3     |         | 260         |        |       |         |      |      | -9.2     | -12.5   |          |
| Cimetidine               | 4.77         | 2.19  |       | 3.55    |      |      | 3.5     | 1.3     | 3.96        | 12.3   |       | 11      |      |      | -13.6    | -9.5    |          |
| Citalopram               |              |       | 1.9   |         | 1.3  |      | 1.6     | 0.4     |             |        | 151   |         | 183  |      | -8.5     | -12.5   |          |
| Clarythromycin           |              | 31.3  |       |         |      |      | 31.3    |         |             | 10.8   |       |         |      |      | -14.0    | -13.2   |          |
| Clemastine fumarate      | 1.29         |       |       |         |      |      | 1.3     |         | 331         |        |       |         |      |      | -8.2     | -13.6   |          |
| Clomipramine             | 1.42         |       | 10.9  |         |      |      | 6.2     | 6.7     | 369         |        | 19    |         |      |      | -9.6     | -12.2   |          |
| Clonazepam               |              |       | 1.3   |         |      |      | 1.3     |         |             |        | 311   |         |      |      | -10.7    | -11.9   |          |
| Clonidine                | 0.99         |       |       |         |      |      | 1.0     |         | 529         |        |       |         |      |      | -13.2    | -9.6    |          |
| Clozapine                |              |       | 2.5   |         |      |      | 2.5     |         |             |        | 68    |         |      |      | -25.5    | -11.0   |          |
| Colchicine               |              | 11.34 |       |         |      |      | 11.3    |         |             | 17.9   |       |         |      |      | -12.9    | -11.9   |          |
| Cyclobenzaprine          | 0.97         |       | 2.8   |         | 0.5  |      | 1.4     | 1.2     | 385         |        |       |         | 122  |      | -8.2     | -12.2   |          |
| Cyclosporine             |              | 9.61  |       |         |      |      | 9.61    |         |             | 15.9   |       |         |      |      |          |         | MW > 800 |
| Daunorubicin             |              | 14.2  |       |         |      |      | 14.2    |         |             | 5.47   |       |         |      |      | -23.2    | -14.8   |          |
| Desipramine              | 1.03         |       |       | 0.59    |      |      | 0.8     | 0.3     | 551         |        |       | 342     |      |      | -11.6    | -12.3   | ER < 1   |
| Dexamethasone            |              | 12.4  |       |         |      |      | 12.4    |         |             | 43.5   |       |         |      |      | -12.6    | -14.8   |          |
| Diazepam                 |              |       |       | 0.7     |      |      | 0.7     |         |             |        |       |         | 277  |      | -8.7     | -11.6   | ER < 1   |
| Diltiazem                | 1.53         | 1.64  |       |         |      |      | 1.6     | 0.1     | 430         | 413    |       |         |      |      | -11.7    | -12.2   |          |
| Diphenhydramine          | 0.91         |       |       |         |      | 0.9  | 0.9     | 0.0     | 698         |        |       |         |      |      | -9.5     | -11.7   | ER < 1   |
| Dipyridamole             |              | 22.7  |       |         |      |      | 22.7    |         |             | 28.5   |       |         |      |      | -20.9    | -13.6   |          |
| Domperidone              | 31.2         |       |       | 62.8    |      |      | 47.0    | 22.3    | 18.5        |        |       | 5       |      |      | -17.4    | -14.2   |          |

|                     |      |      |      |      |     |  |      |      |      |      |     |     |     |  |       |       |                |
|---------------------|------|------|------|------|-----|--|------|------|------|------|-----|-----|-----|--|-------|-------|----------------|
| Donepezil           |      |      | 1.6  |      |     |  | 1.6  |      |      | 219  |     |     |     |  | -11.1 | -13.9 |                |
| Dopamine            |      |      |      | 0.25 |     |  | 0.3  |      |      |      |     |     |     |  | -14.5 | -9.9  | ER < 1         |
| Doxapram (Sinequan) | 1.41 |      | 2    |      |     |  | 1.4  |      | 451  |      | 104 |     | 4   |  | -8.5  | -13.1 |                |
| Doxepin             | 1.15 |      |      |      |     |  | 1.6  | 0.6  | 451  |      |     |     |     |  | -8.5  | -12.7 |                |
| Doxorubicin         |      | 0.67 |      |      |     |  | 0.7  |      |      | 14.5 |     |     |     |  | -25.6 | -14.4 | ER < 1         |
| Doxylamine          | 0.84 |      |      |      |     |  | 0.8  |      | 359  |      |     |     |     |  | -12.0 | -11.8 | ER < 1         |
| Duloxetine          |      |      | 1.8  |      |     |  | 1.8  |      |      |      |     |     |     |  | -10.5 | -12.9 |                |
| Eletriptan          | 44.7 | 31.5 | 22.6 |      |     |  | 32.9 | 11.1 | 14.8 | 18.4 | 91  |     |     |  | -15.3 | -16.0 |                |
| Emetine             |      | 29.2 |      |      |     |  | 29.2 |      |      | 9.61 |     |     |     |  | -12.0 | -16.1 |                |
| Enoxacin            |      |      |      | 0.91 |     |  | 0.9  |      |      |      |     |     | 23  |  | -17.9 | -10.8 | ER < 1         |
| Erythromycin        |      | 14.4 |      |      |     |  | 14.4 |      |      | 0.94 |     |     |     |  |       |       | # rot.b. >= 11 |
| Escitalopram        |      |      | 2    |      |     |  | 2.0  |      |      |      | 161 |     |     |  | -8.5  | -11.9 |                |
| Ethosuximide        |      |      |      |      | 0.8 |  | 0.8  |      |      |      |     |     | 268 |  | -10.8 | -9.1  | ER < 1         |
| Etoposide           |      | 2.8  |      |      |     |  | 2.8  |      |      | 21.4 |     |     |     |  | -19.3 | -17.7 |                |
| Famciclovir         | 3.17 |      |      |      |     |  | 3.2  |      | 71.2 |      |     |     |     |  | -13.8 | -10.3 |                |
| Flumazenil          | 0.92 |      | 1.1  |      |     |  | 1.0  | 0.1  | 597  |      | 308 |     |     |  | -14.2 | -11.2 |                |
| Fluoxetine          | 1.18 |      | 5.2  | 0.68 | 0.6 |  | 1.9  | 2.2  | 521  |      | 21  | 179 | 63  |  | -7.4  | -12.7 |                |
| Flurazepam          | 0.88 |      |      |      |     |  | 0.9  |      | 705  |      |     |     |     |  | -9.7  | -13.4 | ER < 1         |
| Fluvoxamine         | 1.2  |      | 3.1  |      | 0.7 |  | 1.7  | 1.3  | 317  |      | 75  |     | 130 |  | -7.2  | -13.6 |                |
| Galantamine         |      |      | 1    |      |     |  | 1.0  |      |      |      | 156 |     |     |  | -13.1 | -12.5 |                |
| Guanabenz           | 0.91 |      |      |      |     |  | 0.9  |      | 598  |      |     |     |     |  | -23.3 | -8.9  | ER < 1         |
| Guanfacine          | 1.23 |      |      |      |     |  | 1.2  |      | 130  |      |     |     |     |  | -13.1 | -11.8 |                |
| Haloperidol         | 1.04 |      |      | 0.5  | 0.8 |  | 0.8  | 0.3  | 556  |      |     | 323 | 123 |  | -10.5 | -14.9 | ER < 1         |
| Hoechst 33342       |      | 7.75 |      |      |     |  | 7.75 |      |      | 3.35 |     |     |     |  | -26.1 | -14.7 |                |
| Hydrocodone         |      |      | 1.3  |      | 0.9 |  | 1.1  | 0.3  |      |      | 295 |     | 200 |  | -11.8 | -11.4 |                |
| Hydroxyzine         |      |      |      |      | 0.6 |  | 0.6  |      |      |      |     |     | 161 |  | -7.6  | -12.8 | ER < 1         |
| Imipramine          | 1.05 |      |      |      |     |  | 1.1  |      | 393  |      |     |     |     |  | -9.8  | -12.6 |                |
| Indeloxazine        |      |      | 1.4  |      |     |  | 1.4  |      |      |      | 252 |     |     |  | -10.3 | -11.4 |                |
| Indinavir           | 24.6 | 20.3 |      |      |     |  | 22.5 | 3.0  | 10.9 | 8.69 |     |     |     |  | -15.6 | -16.1 |                |
| Indomethacin        | 0.97 |      |      | 0.46 |     |  | 0.7  | 0.4  | 616  |      |     | 291 |     |  | -15.4 | -12.5 | ER < 1         |
| Itraconazole        |      | 0.97 |      |      |     |  | 1.0  |      |      | 571  |     |     |     |  | -14.7 | -15.9 |                |
| Ketamine            | 0.93 |      |      |      |     |  | 0.9  |      | 748  |      |     |     |     |  | -8.5  | -10.3 | ER < 1         |
| Ketoconazole        |      | 1.02 |      |      |     |  | 1.0  |      |      | 316  |     |     |     |  | -11.7 | -15.9 |                |
| Labetolol           | 8.85 |      |      |      |     |  | 8.9  |      | 40.9 |      |     |     |     |  | -15.0 | -14.9 |                |
| Lamotrigine         |      |      | 1.1  |      | 0.7 |  | 0.9  | 0.3  |      |      | 247 |     | 229 |  | -16.2 | -11.6 | ER < 1         |
| Levetiracetam       |      |      | 1.3  |      |     |  | 1.3  |      |      |      |     |     |     |  | -10.9 | -7.8  |                |
| Levomeprazine       | 1.54 |      |      |      |     |  | 1.5  |      | 347  |      |     |     |     |  | -11.3 | -11.4 |                |
| Lidocaine           | 0.83 | 0.99 |      | 0.55 |     |  | 0.8  | 0.2  | 664  | 842  |     | 716 |     |  | -10.5 | -10   | ER < 1         |
| Lofexidine          |      |      | 1.2  |      |     |  | 1.2  |      |      |      |     |     |     |  | -11.4 | -8.6  |                |
| Loperamide          | 9.94 | 7.77 |      |      | 9.4 |  | 9.0  | 1.1  | 77.7 | 99.8 |     |     | 27  |  | -10.3 | -15.6 |                |
| Loratidine          |      | 1.9  |      |      | 0.9 |  | 1.4  | 0.7  |      | 264  |     |     | 89  |  | -9.1  | -12.1 |                |
| Lorazepam           |      |      | 1.2  |      |     |  | 1.2  |      |      |      | 247 |     |     |  | -12.4 | -14.4 |                |
| Lorcainide          | 1.45 |      |      |      |     |  | 1.5  |      | 448  |      |     |     |     |  | -10.4 | -13   |                |
| Mannitol            | 0.88 | 0.82 |      |      |     |  | 0.9  | 0.0  | 8,29 | 11.3 |     |     |     |  | -14.6 | -10.4 | ER < 1         |
| Maprotiline         | 1.05 |      |      |      |     |  | 1.1  |      | 455  |      |     |     |     |  | -9.3  | -11.7 |                |
| Mebendazole         |      | 0.91 |      |      |     |  | 0.9  |      |      | 714  |     |     |     |  | -15.2 | -13.4 | ER < 1         |
| Mephentermine       | 0.87 |      |      |      |     |  | 0.9  |      | 537  |      |     |     |     |  | -8.5  | -9.9  | ER < 1         |
| Meprobamate         | 0.97 |      |      |      |     |  | 1.0  |      | 344  |      |     |     |     |  | -11.2 | -8.8  |                |
| Mequitazine         | 2.81 |      |      |      |     |  | 2.8  |      | 260  |      |     |     |     |  | -12.5 | -9.9  |                |
| Metergoline         | 1.21 |      |      |      |     |  | 1.2  |      | 179  |      |     |     |     |  | -12.9 | -14.3 |                |
| Methotrexate        |      | 0.67 |      |      |     |  | 0.7  |      |      | 10.5 |     |     |     |  | -34.6 | -9.8  | ER < 1         |
| Methylphenidate     |      |      | 1.1  |      | 0.8 |  | 1.0  | 0.2  |      |      | 283 |     | 247 |  | -9.5  | -10.5 |                |
| Methysergide        | 4.33 |      |      | 1.81 |     |  | 3.1  | 1.8  | 174  |      |     | 200 |     |  | -12.3 | -14.3 |                |
| Metoclopramide      |      |      |      |      | 1.1 |  | 1.1  |      |      |      |     |     | 177 |  | -13.8 | -11.0 |                |

|                                     |      |      |     |      |      |  |      |     |      |      |     |     |     |  |       |       |                     |
|-------------------------------------|------|------|-----|------|------|--|------|-----|------|------|-----|-----|-----|--|-------|-------|---------------------|
| Metoprolol                          | 1.21 |      |     |      |      |  | 1.2  |     | 296  |      |     |     |     |  | -8.8  | -11.3 |                     |
| Mexilitene                          | 0.87 |      |     |      |      |  | 0.9  |     | 682  |      |     |     |     |  | -9.2  | -9.6  | ER < 1              |
| Midazolam                           | 1.01 | 0.81 |     |      | 0.7  |  | 0.8  | 0.2 | 609  | 701  |     |     | 225 |  | -12.8 | -12.4 | ER < 1              |
| Minaprine                           |      |      | 1.2 |      |      |  | 1.2  |     |      |      | 366 |     |     |  | -11.2 | -11.9 |                     |
| Mirtazapine                         |      |      | 1.2 |      |      |  | 1.2  |     |      |      | 259 |     |     |  | -9.1  | -11.4 |                     |
| Mitoxantrone                        |      | 3.38 |     |      |      |  | 3.38 |     |      | 1.91 |     |     |     |  |       |       | # rot.b. >= 11      |
| Moclobemide                         |      |      | 1.1 |      |      |  | 1.1  |     |      |      | 352 |     |     |  | -11.2 | -10.5 |                     |
| Monensin                            |      | 2.88 |     |      |      |  | 2.9  |     |      | 102  |     |     |     |  | -14.5 | -16.2 |                     |
| Morphine                            |      |      |     |      | 1.7  |  | 1.7  |     |      |      |     |     | 18  |  | -14.4 | -14.7 |                     |
| Nalbuphine                          | 2.17 |      |     | 1.15 |      |  | 1.7  | 0.7 | 140  |      |     | 130 |     |  | -13.9 | -13.4 |                     |
| Nalmefene                           |      |      | 1.1 |      |      |  | 1.1  |     |      |      |     |     |     |  | -14.0 | -13.2 |                     |
| Naloxone                            | 1.29 |      |     | 0.41 |      |  | 0.9  | 0.6 | 495  |      |     | 410 |     |  | -14.6 | -10.8 | ER < 1              |
| Naltrexone                          | 1.04 |      | 1.1 | 0.75 |      |  | 1.0  | 0.2 | 402  |      | 204 | 369 |     |  | -15.5 | -13.0 |                     |
| Nelfinavir                          | 22.3 | 8.86 |     |      |      |  | 15.6 | 9.5 | 35.3 | 38.1 |     |     |     |  | -15.3 | -15.5 |                     |
| Nemonapride                         |      |      | 1.6 |      |      |  | 1.6  |     |      |      | 206 |     |     |  | -15.0 | -14.4 |                     |
| Neostigmine                         | 2.23 | 1.81 |     |      |      |  | 2.0  |     | 6.92 | 7.58 |     |     |     |  |       |       | quaternary ammonium |
| Nicardipine                         |      | 1.08 |     |      |      |  | 1.1  |     |      | 614  |     |     |     |  | -11.6 | -15.3 |                     |
| Nicotrol                            |      |      | 1.3 |      |      |  | 1.3  |     |      |      | 281 |     |     |  | -9.1  | -8.2  |                     |
| Nifedipine                          |      | 1.26 |     |      |      |  | 1.3  |     |      | 610  |     |     |     |  | -10.5 | -10.7 |                     |
| Nimodipine                          |      |      | 1.5 |      |      |  | 1.5  |     |      |      | 154 |     |     |  | -9.0  | -11.0 |                     |
| Nitrazepam                          | 1.17 |      |     |      |      |  | 1.2  |     | 389  |      |     |     |     |  | -10.4 | -11.5 |                     |
| Nitrendipine                        |      | 0.8  |     |      |      |  | 0.8  |     |      | 604  |     |     |     |  | -9.8  | -10.8 | ER < 1              |
| Nordazepam                          | 0.93 |      |     |      |      |  | 0.9  |     | 647  |      |     |     |     |  | -10.0 | -13.6 | ER < 1              |
| Nortriptylene                       | 1.39 |      |     |      | 0.6  |  | 1.0  | 0.6 | 337  |      |     |     | 91  |  | -9.6  | -14.4 |                     |
| Noscapine                           | 1.03 |      |     |      |      |  | 1.0  |     | 642  |      |     |     |     |  | -12.9 | -12.5 |                     |
| Olanzapine                          |      |      | 2   |      |      |  | 2.0  |     |      |      | 188 |     |     |  | -14.6 | -10.7 |                     |
| Oxcarbazepine                       |      |      | 1.4 |      |      |  | 1.4  |     |      |      |     |     |     |  | -10.8 | -11.3 |                     |
| Oxprenolol                          | 1.37 |      |     |      |      |  | 1.4  |     | 308  |      |     |     |     |  | -8.7  | -10.0 |                     |
| Oxycodone                           |      |      | 1.1 |      |      |  | 1.1  |     |      |      | 283 |     |     |  | -12.5 | -11.4 |                     |
| Paliperidone (9-Hydroxyrisperidone) |      |      | 4.1 |      | 2.1  |  | 3.1  | 1.4 |      |      | 215 |     | 168 |  | -15.4 | -14.7 |                     |
| Paroxetine                          |      |      | 5.5 |      | 0.7  |  | 3.1  | 3.4 |      |      | 10  |     | 61  |  | -11.5 | -13.2 |                     |
| Pergolide                           |      |      | 1.6 |      |      |  | 1.6  |     |      |      | 97  |     |     |  | -10.2 | -13.1 |                     |
| Perospirone                         |      |      | 7.8 |      |      |  | 7.8  |     |      |      |     |     |     |  | -13.6 | -13.7 |                     |
| Perphenazine                        | 1.47 |      |     |      |      |  | 1.5  |     | 305  |      |     |     |     |  | -11.0 | -13.4 |                     |
| Pheniramine                         | 1.41 |      |     |      |      |  | 1.4  |     | 308  |      |     |     |     |  | -9.8  | -10.5 |                     |
| Phenytoin                           |      |      | 1.1 |      | 0.9  |  | 1.0  | 0.1 |      |      | 286 |     | 240 |  | -13.3 | -11.7 |                     |
| Pirenzapine                         | 3.63 |      |     |      |      |  | 3.6  |     | 1.76 |      |     |     |     |  | -15.2 | -12   |                     |
| Practolol                           |      | 1.32 |     |      |      |  | 1.3  |     |      | 12.4 |     |     |     |  | -13.0 | -10.4 |                     |
| Pramipexole                         |      |      | 1   |      |      |  | 1.0  |     |      |      | 128 |     |     |  | -13.0 | -8.6  |                     |
| Prazosin                            |      | 4.63 |     |      | 3.2  |  | 3.9  | 1.0 |      | 143  |     |     | 106 |  | -19.7 | -12.7 |                     |
| Prednisolone                        |      |      |     |      | 3.8  |  | 3.8  |     |      |      |     |     | 123 |  | -13.1 | -14.6 |                     |
| Procyclidine                        | 0.95 |      |     |      |      |  | 1.0  |     | 703  |      |     |     |     |  | -7.8  | -12.3 |                     |
| Progabide                           | 0.88 |      |     |      |      |  | 0.9  |     | 684  |      |     |     |     |  | -10.7 | -13.6 | ER < 1              |
| Promazine                           | 1.15 |      |     |      |      |  | 1.2  |     | 336  |      |     |     |     |  | -10.8 | -11.3 |                     |
| Promethazine                        | 1.27 |      |     |      |      |  | 1.3  |     | 430  |      |     |     |     |  | -10.1 | -10.5 |                     |
| Propoxyphene                        |      |      |     |      | 0.7  |  | 0.7  |     |      |      |     |     | 219 |  | -5.3  | -11.9 | ER < 1              |
| Propranolol                         | 1.04 | 1.04 |     | 0.51 |      |  | 0.9  | 0.3 | 403  | 496  |     | 379 |     |  | -9.7  | -11.9 | ER < 1              |
| Protriptylene                       | 2.37 |      |     |      |      |  | 2.4  |     | 259  |      |     |     |     |  | -9.4  | -13.9 |                     |
| Puromycin                           |      | 3.1  |     |      |      |  | 3.1  |     |      | 11.5 |     |     |     |  | -20.2 | -12.9 |                     |
| Pyridostigmine                      |      | 1.24 |     |      |      |  | 1.24 |     |      | 10.2 |     |     |     |  |       |       | quaternary ammonium |
| Quetiapine                          |      |      | 1.8 |      |      |  | 1.8  |     |      |      | 218 |     |     |  | -8.1  | -13.5 |                     |
| Quinidine                           |      | 27.2 |     | 11.4 | 16.1 |  | 18.2 | 8.1 |      | 36.4 |     | 31  | 80  |  | -14.1 | -12.6 |                     |
| Ramelteon                           |      |      | 1   |      |      |  | 1.0  |     |      |      | 334 |     |     |  | -8.7  | -11.8 |                     |
| Ranitidine                          |      | 1.35 |     |      |      |  | 1.35 |     |      | 14.4 |     |     |     |  |       |       | quaternary ammonium |

|               |      |      |      |       |      |  |       |      |      |       |     |     |     |  |       |       |                |
|---------------|------|------|------|-------|------|--|-------|------|------|-------|-----|-----|-----|--|-------|-------|----------------|
| Rasagiline    |      |      | 1    |       |      |  | 1.0   |      |      |       |     |     |     |  | -7.3  | -9.1  |                |
| Reboxetine    |      |      | 1.4  |       |      |  | 1.4   |      |      | 122   |     |     |     |  | -10.0 | -12.8 |                |
| Reserpine     |      | 3.71 |      |       |      |  | 3.7   |      | 68.1 |       |     |     |     |  | -14.3 | -11.2 |                |
| Riluzole      |      |      | 1.5  |       |      |  | 1.5   |      |      | 304   |     |     |     |  | -9.8  | -9.1  |                |
| Rimonabant    |      |      | 2.5  |       |      |  | 2.5   |      |      | 35    |     |     |     |  | -10.1 | -12.1 |                |
| Risperidone   | 1.61 |      | 2.6  |       | 1.2  |  | 1.8   | 0.7  | 389  |       |     | 198 |     |  | -12.8 | -12.6 |                |
| Ritonavir     |      | 54.4 |      |       | 49.5 |  | 54.4  |      |      | 15.8  |     |     | 56  |  |       |       | # rot.b. >= 11 |
| Rivastigmine  |      |      | 1    |       |      |  | 1.0   |      |      |       |     |     |     |  | -9.4  | -9.6  |                |
| Ropinirole    |      |      | 1.3  |       |      |  | 1.3   |      |      |       |     |     |     |  | -9.6  | -12.4 |                |
| Ropivacaine   |      |      | 1    |       |      |  | 1.0   |      |      |       |     |     |     |  | -10.7 | -10.7 |                |
| Saquinavir    | 261  | 165  |      |       |      |  | 213.0 | 67.9 | 1.51 | 3.01  |     |     |     |  | -20.8 | -16.8 |                |
| Scopolamine   | 1.14 |      |      | 0.97  |      |  | 1.1   | 0.1  | 171  |       |     | 156 |     |  | -7.8  | -12.1 |                |
| Selegiline    | 0.76 |      |      |       | 0.8  |  | 0.8   | 0.0  | 703  |       |     | 232 |     |  | -5.5  | -9.3  | ER < 1         |
| Sertindole    |      |      | 10.4 |       |      |  | 10.4  |      |      |       |     |     |     |  | -12.8 | -14.1 |                |
| Sertraline    |      |      | 11.2 |       | 3.6  |  | 7.4   | 5.4  |      |       |     | 22  | 19  |  | -9.0  | -13.1 |                |
| Sulfasalazine | 1.65 |      |      | 0.5   |      |  | 1.1   | 0.8  | 6.23 |       |     | 6   |     |  | -26.5 | -12.9 |                |
| Sulpiride     |      |      |      |       | 0.9  |  | 0.9   |      |      |       |     | 3   | 9   |  | -17.0 | -12.9 | ER < 1         |
| Sumatriptan   | 1.48 | 1.37 |      |       |      |  | 1.4   | 0.1  | 3.99 | 9.53  |     |     |     |  | -16.5 | -11.8 |                |
| Tacrine       | 0.93 |      | 1.3  |       |      |  | 1.1   | 0.3  | 438  |       |     |     |     |  | -14.5 | -11.8 |                |
| Talipexole    |      |      | 1.2  |       |      |  | 2.2   |      |      |       |     |     |     |  | -10.5 | -8.6  |                |
| Taxol         |      | >108 |      |       |      |  | >108  |      |      | <1.25 |     |     |     |  |       |       | MW > 800       |
| Terfenadine   | 2.88 | 4.66 |      |       |      |  | 3.8   | 1.3  | 146  | 65.6  |     |     |     |  | -8.2  | -16.6 |                |
| Testosterone  |      | 0.73 |      |       |      |  | 0.7   |      |      | 916   |     |     |     |  | -5.9  | -12.4 | ER < 1         |
| Thiopental    |      |      |      |       | 0.9  |  | 0.9   |      |      |       |     |     | 252 |  | -11.4 | -10.4 | ER < 1         |
| Tiagabine     |      |      | 1.5  |       |      |  | 1.5   |      |      |       |     | 207 |     |  | -14.8 | -13.1 |                |
| Tianeptine    |      |      | 1.5  |       |      |  | 1.5   |      |      |       |     | 227 |     |  | -14.7 | -12.9 |                |
| Topiramate    |      |      | 1.1  |       |      |  | 1.1   |      |      |       |     |     |     |  | -13.1 | -11.1 |                |
| Toxindole     | 1.15 |      |      |       |      |  | 1.2   |      | 519  |       |     |     |     |  | -7.8  | -8.9  |                |
| Trazodone     | 0.94 |      |      |       | 0.8  |  | 0.9   | 0.1  | 747  |       |     |     | 197 |  | -12.6 | -12.0 | ER < 1         |
| Triamterene   |      | 0.99 |      |       |      |  | 1.0   |      |      | 185   |     |     |     |  | -21.3 | -10.2 |                |
| Trimethoprim  | 1.94 | 3.61 |      |       |      |  | 2.8   | 1.2  | 97.8 | 73.9  |     |     |     |  | -19.2 | -10.7 |                |
| Trimipramine  | 0.92 |      |      |       |      |  | 0.9   |      | 405  |       |     |     |     |  | -9.7  | -12.8 | ER < 1         |
| Tripolidine   |      |      |      |       | 0.9  |  | 0.9   |      |      |       |     |     |     |  | -8.6  | -10.4 | ER < 1         |
| Tropisetron   |      |      | 1.2  |       |      |  | 1.2   |      |      |       |     |     |     |  | -12.6 | -12.8 |                |
| Varenicline   |      |      | 1.2  |       |      |  | 1.2   |      |      |       |     | 246 |     |  | -12.7 | -8.9  |                |
| Venlafaxine   |      |      | 1.3  |       | 0.6  |  | 1.0   | 0.5  |      |       |     | 207 | 221 |  | -8.3  | -11.3 |                |
| Verapamil     | 1.73 | 1.16 | 2.3  | 0.96  | 1.8  |  | 1.6   | 0.5  | 415  | 591   |     | 335 | 126 |  | -8.0  | -16.8 |                |
| Vinblastine   |      | > 23 |      | 17.63 |      |  | 20.3  |      |      | < 10  |     | 16  |     |  |       |       | MW > 800       |
| Vincristine   |      | 6.31 |      |       |      |  | 6.3   |      |      | 2.36  |     |     |     |  |       |       | MW > 800       |
| Vinorelbine   |      | 69.8 |      |       |      |  | 69.8  |      |      | 2.52  |     |     |     |  | -24.5 | -12.5 |                |
| Vinpocetine   |      |      | 2.1  |       |      |  | 2.1   |      |      |       |     | 47  |     |  | -7.2  | -10.7 |                |
| Warfarin      | 0.83 |      |      |       |      |  | 0.8   |      | 781  |       |     |     |     |  | -9.4  | -10.7 | ER < 1         |
| Yohimbine     |      | 1.17 |      |       |      |  | 1.2   |      |      |       | 429 |     |     |  | -12.7 | -15   |                |
| Zaleplon      |      |      | 1.4  |       |      |  | 1.4   |      |      |       |     | 371 |     |  | -11.9 | -13.7 |                |
| Zimeldine     | 1.01 |      |      |       |      |  | 1.0   |      | 676  |       |     |     |     |  | -8.5  | -11.5 |                |
| Ziprasidone   |      |      | 2.3  |       |      |  | 2.3   |      |      |       |     | 103 |     |  | -13.9 | -13.7 |                |
| Zolmitriptan  | 2.48 |      |      |       |      |  | 2.5   |      | 2.52 |       |     |     |     |  | -16.0 | -12.6 |                |
| Zolpidem      | 1.14 |      | 1.2  |       | 0.7  |  | 1.0   | 0.3  | 694  |       |     | 803 | 234 |  | -10.7 | -11.6 |                |
| Zonisamide    |      |      | 1    |       |      |  | 1.0   |      |      |       |     | 291 |     |  | -13.8 | -9.4  |                |
| Zotepine      |      |      | 5.1  |       |      |  | 5.1   |      |      |       |     |     |     |  | -10.5 | -13.3 |                |

**Table S2.**

| <b>Compound</b>    | <b>CNS+ /CNS-</b> | <b>Average ER</b> | <b>logPm</b> | <b>GlideXP<br/>(kcal/mol)</b> | <b>Excluded</b>     |
|--------------------|-------------------|-------------------|--------------|-------------------------------|---------------------|
| Amitriptyline      | CNS+              | 1.3               | -7.8         | -13.0                         |                     |
| Anitpyrine         | CNS+              | 0.8               | -8.3         | -9.4                          |                     |
| Caffeine           | CNS+              | 0.6               | -11.5        | -9.7                          |                     |
| Carbamazepine      | CNS+              | 0.9               | -10.7        | -11.4                         |                     |
| Chlopromazine      | CNS+              | 2.4               | -10.8        | -11.8                         |                     |
| Clonidine          | CNS+              | 1.0               | -13.2        | -9.6                          |                     |
| Desipramine        | CNS+              | 0.8               | -11.6        | -12.3                         |                     |
| Doxylamine         | CNS+              | 0.8               | -12.0        | -11.8                         |                     |
| Fluoxetine         | CNS+              | 1.9               | -7.4         | -12.7                         |                     |
| Guanfacine         | CNS+              | 1.2               | -13.1        | -11.8                         |                     |
| Indomethacin       | CNS+              | 0.7               | -15.4        | -12.5                         |                     |
| Atenolol           | CNS-              | 1.0               | -13.0        | -10.0                         |                     |
| Bretylium tosylate | CNS-              |                   | -            | -                             | quaternary ammonium |
| Cefuroxime         | CNS-              |                   | -26.1        | -11.4                         |                     |
| Chlorothiazide     | CNS-              |                   | -20.9        | -10                           |                     |
| Furosemide         | CNS-              |                   | -21.0        | -12.2                         |                     |
| Lincomycin         | CNS-              |                   | -15.7        | -11                           |                     |
| Methotrexate       | CNS-              | 0.7               | -34.6        | -9.8                          |                     |
| Ranitidine         | CNS-              |                   | -            | -                             | quaternary ammonium |
| Sulfasalazine      | CNS-              | 1.1               | -26.5        | -12.9                         |                     |
| Digoxin            | CNS-              |                   | -            | -                             | 11 rotatable bonds  |
| Dipyridamole       | CNS-              | 22.7              | -20.9        | -13.6                         |                     |
| Etoposide          | CNS-              | 2.8               | -19.3        | -17.7                         |                     |
| Labetalol          | CNS-              | 8.9               | -15.0        | -14.9                         |                     |
| Loperamide         | CNS-              | 9.0               | -10.3        | -15.6                         |                     |
| Quinidine          | CNS-              | 18.2              | -14.1        | -12.6                         |                     |
| Rhodamine 123      | CNS-              |                   | -21.0        | -12.0                         |                     |
| Vinblastine        | CNS-              |                   | -            | -                             | MW > 800            |

**Table S3.**

| Compound  | Mean P <sub>app</sub> (10 <sup>-6</sup> cm/s) |        | Average ER | logP <sub>m</sub> | Glide XP<br>(kcal/mol) | ER <sub>calc</sub> |
|-----------|-----------------------------------------------|--------|------------|-------------------|------------------------|--------------------|
|           | A to B                                        | B to A |            |                   |                        |                    |
| <b>1</b>  | 24.4                                          | 29.6   | 1.2        | -10.68            | -10.9                  | 1.2                |
| <b>2</b>  | 10.6                                          | 16.7   | 1.6        | -14.4             | -9.9                   | 2.9                |
| <b>3</b>  | 21.8                                          | 30.9   | 1.4        | -12.36            | -12.7                  | 4.8                |
| <b>4</b>  | 19.6                                          | 31.8   | 1.6        | -13.78            | -12.9                  | 15.2               |
| <b>5</b>  | 20.3                                          | 36.4   | 1.8        | -14               | -13                    | 19.2               |
| <b>6</b>  | 4.75                                          | 42.8   | 9          | -16.19            | -14.6                  | 235.8              |
| <b>7</b>  | 10.3                                          | 45.5   | 4.4        | -13.02            | -13.2                  | 10.2               |
| <b>8</b>  | 14.5                                          | 34.2   | 2.4        | -13.32            | -14.2                  | 20.1               |
| <b>9</b>  | 0.51                                          | 2.9    | 5.8        | -15.97            | -12.3                  | 58.1               |
| <b>10</b> | 8.41                                          | 25.8   | 3.1        | -12.76            | -11                    | 2.3                |

Table S4.

| Series # | Compound Number | ER   | logER | Exp Rank | P <sub>app</sub> (10 <sup>-6</sup> cm/s) | ER <sub>calc</sub> | logER <sub>calc</sub> | Calc Rank |
|----------|-----------------|------|-------|----------|------------------------------------------|--------------------|-----------------------|-----------|
| 1        | 1               | 22.6 | 1.35  | 1        | NR                                       | 145                | 2.16                  | 1         |
|          | 2               | 8.6  | 0.93  | 2        | 21                                       | 11                 | 1.06                  | 2         |
|          | 3               | 3.2  | 0.51  | 3        | 31                                       | 5                  | 0.71                  | 6         |
|          | 4               | 2.3  | 0.36  | 4        | 28                                       | 6                  | 0.77                  | 5         |
|          | 5               | 8.6  | 0.93  | 2        | 25                                       | 7                  | 0.86                  | 3         |
|          | 6               | 1.9  | 0.28  | 5        | 34                                       | 7                  | 0.85                  | 4         |
| 2        | 7               | 10   | 1.00  | 1        | <1                                       | 3214               | 3.51                  | 1         |
|          | 8               | 1.3  | 0.11  | 2        | 3                                        | 1282               | 3.11                  | 2         |
| 3        | 9               | 17   | 1.23  | 3        | 20                                       | 31                 | 1.50                  | 5         |
|          | 10              | 11   | 1.04  | 4        | 33                                       | 45                 | 1.65                  | 4         |
|          | 11              | 5    | 0.70  | 5        | 27                                       | 31                 | 1.49                  | 5         |
|          | 12              | 1.6  | 0.20  | 6        | 38                                       | 133                | 2.12                  | 3         |
|          | 13              | 50   | 1.70  | 1        | 19                                       | 233                | 2.37                  | 1         |
|          | 14              | 20   | 1.30  | 2        | 31                                       | 185                | 2.27                  | 2         |
| 4        | 15              | 5.8  | 0.76  | 1        | 60                                       | 434                | 2.64                  | 1         |
|          | 16              | 3.2  | 0.51  | 2        | 69                                       | 52                 | 1.72                  | 2         |
|          | 17              | 1.1  | 0.04  | 3        | 68                                       | 7                  | 0.81                  | 3         |
| 5        | 18              | 4.1  | 0.61  | 1        | 28.8                                     | 146                | 2.16                  | 1         |
|          | 19              | 2.6  | 0.41  | 2        | 54                                       | 26                 | 1.42                  | 2         |
| 6        | 20              | 4.3  | 0.63  | 2        | -                                        | 2                  | 0.36                  | 1         |
|          | 21              | 2.7  | 0.43  | 3        | -                                        | 1                  | 0.12                  | 3         |
|          | 22              | 20   | 1.30  | 1        | -                                        | 2                  | 0.31                  | 2         |
| 7        | 23              | 6.8  | 0.83  | 2        | -                                        | 171                | 2.23                  | 1         |
|          | 24              | 13   | 1.11  | 1        | -                                        | 162                | 2.21                  | 2         |
|          | 25              | 2    | 0.30  | 3        | -                                        | 11                 | 1.03                  | 6         |
|          | 26              | 2    | 0.30  | 3        | -                                        | 21                 | 1.33                  | 4         |
|          | 27              | 1.4  | 0.15  | 4        | -                                        | 28                 | 1.44                  | 3         |
|          | 28              | 2    | 0.30  | 3        | -                                        | 18                 | 1.26                  | 5         |
| 8        | 29              | 74   | 1.87  | 1        | -                                        | 1867               | 3.27                  | 1         |
|          | 30              | 2.9  | 0.46  | 2        | -                                        | 88                 | 1.94                  | 2         |
|          | 31              | 2.6  | 0.41  | 3        | -                                        | 53                 | 1.72                  | 2         |



|           |           |      |       |          |      |       |      |          |
|-----------|-----------|------|-------|----------|------|-------|------|----------|
| <b>9</b>  | <b>32</b> | 14.0 | 1.15  | <b>1</b> | -    | 124   | 2.09 | <b>1</b> |
|           | <b>33</b> | 4.7  | 0.67  | 2        | -    | 25    | 1.39 | 3        |
|           | <b>34</b> | 2.0  | 0.29  | <b>4</b> | -    | 15    | 1.19 | <b>4</b> |
| <b>10</b> | <b>35</b> | 2.5  | 0.40  | 5        | 27   | 316   | 2.50 | 4        |
|           | <b>36</b> | 14   | 1.15  | <b>1</b> | 34   | 8317  | 3.92 | <b>1</b> |
|           | <b>37</b> | 4.8  | 0.68  | <b>2</b> | 21   | 1519  | 3.18 | <b>2</b> |
|           | <b>38</b> | 2.3  | 0.36  | 6        | 26   | 206   | 2.31 | 5        |
|           | <b>39</b> | 2.6  | 0.41  | 4        | 31   | 543   | 2.74 | 3        |
|           | <b>40</b> | 3.1  | 0.49  | 3        | 26   | 150   | 2.18 | 6        |
| <b>11</b> | <b>41</b> | 23   | 1.36  | <b>1</b> | 1    | 2709  | 3.43 | <b>1</b> |
|           | <b>42</b> | 3    | 0.48  | <b>2</b> | 7    | 43    | 1.64 | <b>2</b> |
| <b>12</b> | <b>43</b> | 1.9  | 0.28  | <b>2</b> | -    | 2     | 0.22 | <b>2</b> |
|           | <b>44</b> | 9.1  | 0.96  | <b>1</b> | -    | 3     | 0.49 | <b>1</b> |
| <b>13</b> | <b>45</b> | -    | -     |          | -    | 3     | 0.41 |          |
|           | <b>46</b> | 2.4  | 0.38  | 4        | -    | 5     | 0.72 | 2        |
|           | <b>47</b> | 11.4 | 1.06  | <b>1</b> | -    | 7     | 0.86 | <b>1</b> |
|           | <b>48</b> | 3    | 0.48  | <b>3</b> | -    | 5     | 0.69 | <b>3</b> |
|           | <b>49</b> | 3.9  | 0.59  | 2        | -    | 2     | 0.39 | 4        |
| <b>14</b> | <b>50</b> | yes  |       |          | -    | 43    | 1.63 |          |
|           | <b>51</b> | yes  |       |          | -    | 14    | 1.14 |          |
|           | <b>52</b> | yes  |       |          | -    | 27    | 1.44 |          |
|           | <b>53</b> | no   |       |          | -    | 2     | 0.25 |          |
|           | <b>54</b> | no   |       |          | -    | 10    | 1.00 |          |
| <b>15</b> | <b>55</b> | no   |       |          | -    | 2     | 0.33 |          |
|           | <b>56</b> | NR   | -     |          | -    |       |      |          |
| <b>16</b> | <b>57</b> | 5.8  | 0.76  |          | -    |       |      |          |
|           | <b>58</b> | 2.9  | 0.46  | <b>2</b> | 28.5 | 2     | 0.27 | <b>2</b> |
| <b>17</b> | <b>59</b> | 6.8  | 0.83  | <b>1</b> | 6.6  | 119   | 2.07 | <b>1</b> |
|           | <b>60</b> | -    | -     |          |      | 14    | 1.15 |          |
|           | <b>61</b> | -    | -     |          |      | 9     | 0.96 |          |
|           | <b>62</b> | 10   | 1.00  | 1        | NR   | 75.9  | 1.88 | 2        |
|           | <b>63</b> | 0.9  | -0.05 |          | 19   | 177.1 | 2.25 |          |
|           | <b>64</b> | 1.5  | 0.18  | 2        | 0.4  | 255.9 | 2.41 | 1        |
|           | <b>65</b> | 0.6  | -0.22 |          | 18   | 53.8  | 1.73 |          |
